# Supplementary material
Source: PubMed Central journal article supplement (PMC9731259)
Supplement: 0224.pdf [file 0224.pdf]

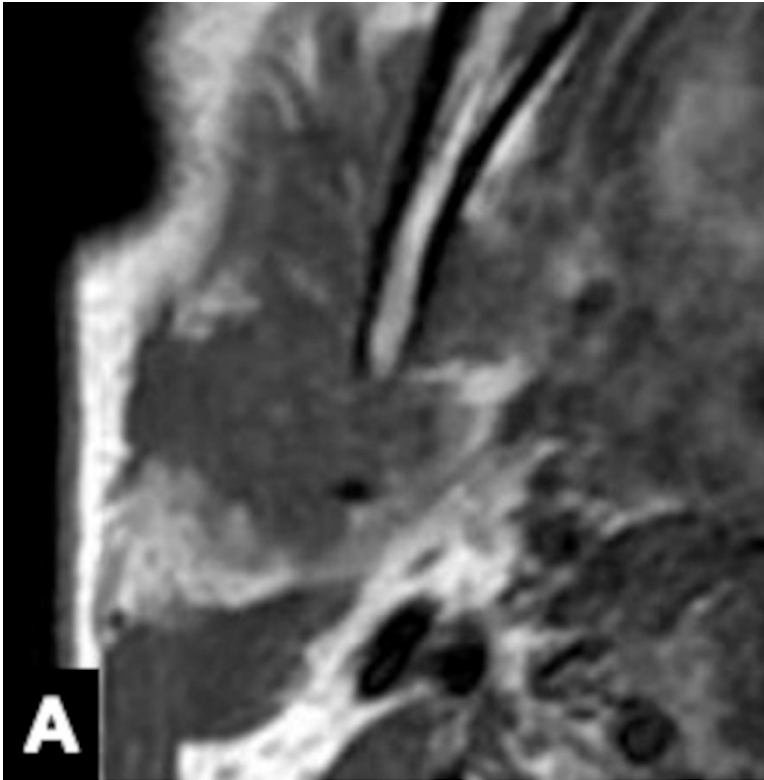

***Fig. 1' Corona sign on FS-T2WI and CE-FS-T1WI***

Invasive CXPA (salivary duct carcinoma) of the right parotid gland in a 77-year-old man. MRI shows a homogeneous low-intensity tumor on axial T1WI (A), mixed high- and low-intensity signals on axial fat-suppressed T2WI (FS-T2WI) (B), and irregularly enhanced signal on axial contrast-enhanced-FS-T1WI (CE-FS-T1WI) (C). The tumor size on FS-T2WI and CE-FS-T1WI was larger than that on T1WI. We defined these MRI findings as corona signs on FS-T2WI and CE-FS-T1WI.

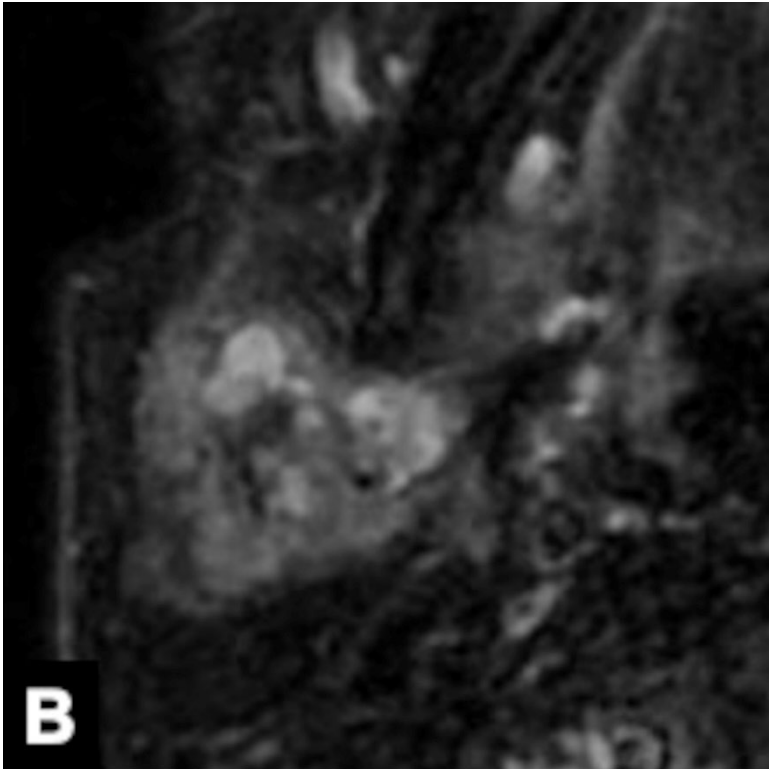

**Fig. 1'** *Corona sign on FS-T2WI and CE-FS-T1WI*

Invasive CXPA (salivary duct carcinoma) of the right parotid gland in a 77-year-old man. MRI shows a homogeneous low-intensity tumor on axial T1WI (A), mixed high- and low-intensity signals on axial fat-suppressed T2WI (FS-T2WI) (B), and irregularly enhanced signal on axial contrast-enhanced-FS-T1WI (CE-FS-T1WI) (C). The tumor size on FS-T2WI and CE-FS-T1WI was larger than that on T1WI. We defined these MRI findings as corona signs on FS-T2WI and CE-FS-T1WI.

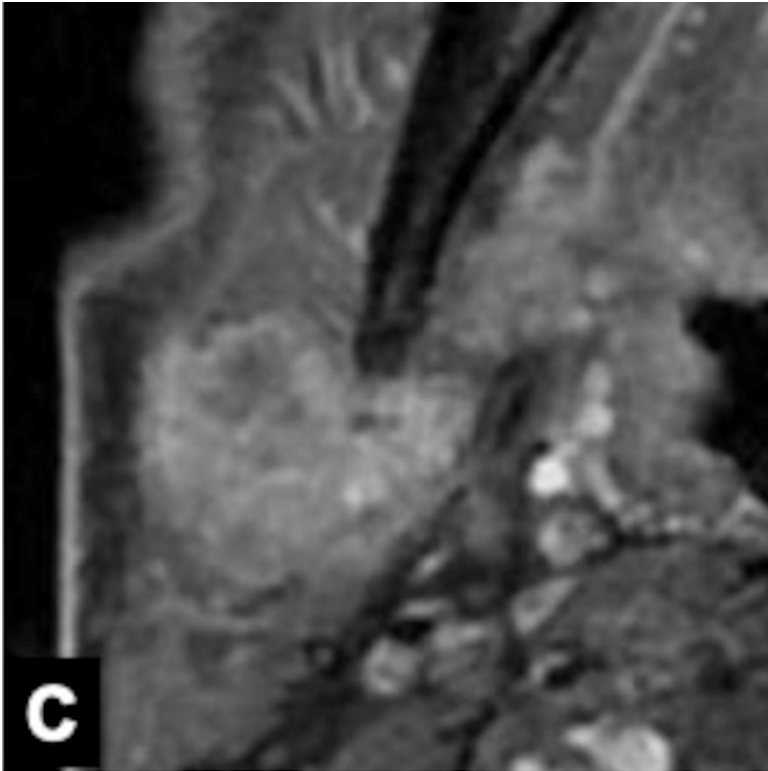

**Fig. 1' Corona sign on FS-T2WI and CE-FS-T1WI**

Invasive CXPA (salivary duct carcinoma) of the right parotid gland in a 77-year-old man. MRI shows a homogeneous low-intensity tumor on axial T1WI (A), mixed high- and low-intensity signals on axial fat-suppressed T2WI (FS-T2WI) (B), and irregularly enhanced signal on axial contrast-enhanced-FS-T1WI (CE-FS-T1WI) (C). The tumor size on FS-T2WI and CE-FS-T1WI was larger than that on T1WI. We defined these MRI findings as corona signs on FS-T2WI and CE-FS-T1WI.

**Supplement. Image evaluation for each evaluator**

| Border  | Rater1 | Rater2 | Rater3 |
|---------|--------|--------|--------|
| Case 1  | 0      | 0      | 1      |
| Case 2  | 0      | 0      | 0      |
| Case 3  | 1      | 1      | 2      |
| Case 4  | 0      | 1      | 0      |
| Case 5  | 1      | 1      | 2      |
| Case 6  | 2      | 2      | 2      |
| Case 7  | 1      | 1      | 2      |
| Case 8  | 1      | 1      | 2      |
| Case 9  | 0      | 0      | 1      |
| Case 10 | 1      | 1      | 2      |
| Case 11 | 1      | 1      | 1      |
| Case 12 | 0      | 1      | 1      |
| Case 13 | 1      | 1      | 1      |
| Case 14 | 0      | 0      | 0      |
| Case 15 | 1      | 1      | 2      |
| Case 16 | 1      | 1      | 2      |
| Case 17 | 0      | 1      | 1      |
| Case 18 | 0      | 0      | 1      |
| Case 19 | 1      | 1      | 1      |
| Case 20 | 0      | 0      | 1      |
| Case 21 | 1      | 2      | 2      |
| Case 22 | 1      | 1      | 2      |
| Case 23 | 1      | 2      | 2      |
| Case 24 | 0      | 1      | 2      |
| Case 25 | 2      | 2      | 2      |
| Case 26 | 0      | 1      | 1      |
| Case 27 | 1      | 1      | 0      |
| Case 28 | 1      | 2      | 2      |
| Case 29 | 0      | 0      | 1      |
| Case 30 | 0      | 1      | 1      |
| Case 31 | 1      | 1      | 2      |
| Case 32 | 1      | 2      | 1      |

|         |   |   |   |
|---------|---|---|---|
| Case 33 | 0 | 0 | 1 |
| Case 34 | 1 | 2 | 2 |
| Case 35 | 0 | 0 | 1 |
| Case 36 | 0 | 1 | 2 |
| Case 37 | 1 | 1 | 1 |

(0:well defined, 1:partially ill-defined, 2:totally ill-defined)

| Capsule | Rater1 | Rater2 | Rater3 |
|---------|--------|--------|--------|
| Case 1  | 0      | 0      | 1      |
| Case 2  | 0      | 0      | 0      |
| Case 3  | 2      | 1      | 2      |
| Case 4  | 0      | 1      | 0      |
| Case 5  | 2      | 1      | 2      |
| Case 6  | 2      | 2      | 2      |
| Case 7  | 2      | 1      | 2      |
| Case 8  | 2      | 1      | 2      |
| Case 9  | 0      | 1      | 1      |
| Case 10 | 1      | 1      | 2      |
| Case 11 | 0      | 1      | 0      |
| Case 12 | 2      | 2      | 2      |
| Case 13 | 2      | 1      | 2      |
| Case 14 | 0      | 1      | 0      |
| Case 15 | 1      | 2      | 2      |
| Case 16 | 1      | 1      | 2      |
| Case 17 | 1      | 1      | 1      |
| Case 18 | 0      | 1      | 1      |
| Case 19 | 1      | 1      | 1      |
| Case 20 | 0      | 0      | 1      |
| Case 21 | 2      | 2      | 2      |
| Case 22 | 1      | 2      | 2      |
| Case 23 | 1      | 2      | 1      |
| Case 24 | 1      | 2      | 2      |
| Case 25 | 1      | 2      | 2      |
| Case 26 | 0      | 2      | 1      |
| Case 27 | 0      | 1      | 0      |

|         |   |   |   |
|---------|---|---|---|
| Case 28 | 2 | 2 | 2 |
| Case 29 | 0 | 0 | 1 |
| Case 30 | 0 | 1 | 1 |
| Case 31 | 0 | 1 | 2 |
| Case 32 | 0 | 1 | 1 |
| Case 33 | 1 | 0 | 1 |
| Case 34 | 1 | 1 | 1 |
| Case 35 | 0 | 0 | 0 |
| Case 36 | 0 | 0 | 1 |
| Case 37 | 1 | 1 | 1 |

(0:none, 1:partial, 2: total)

| Black ring sign | Rater1 | Rater2 | Rater3 |
|-----------------|--------|--------|--------|
| Case 1          | 0      | 0      | 0      |
| Case 2          | 0      | 0      | 0      |
| Case 3          | 1      | 1      | 1      |
| Case 4          | 0      | 0      | 0      |
| Case 5          | 1      | 1      | 1      |
| Case 6          | 1      | 1      | 1      |
| Case 7          | 1      | 1      | 1      |
| Case 8          | 0      | 0      | 0      |
| Case 9          | 0      | 0      | 0      |
| Case 10         | 1      | 1      | 1      |
| Case 11         | 0      | 0      | 0      |
| Case 12         | 0      | 0      | 0      |
| Case 13         | 1      | 1      | 1      |
| Case 14         | 0      | 0      | 0      |
| Case 15         | 1      | 1      | 1      |
| Case 16         | 0      | 0      | 0      |
| Case 17         | 0      | 0      | 0      |
| Case 18         | 0      | 0      | 0      |
| Case 19         | 1      | 1      | 1      |
| Case 20         | 0      | 0      | 1      |

|         |   |   |   |
|---------|---|---|---|
| Case 21 | 1 | 1 | 1 |
| Case 22 | 1 | 1 | 1 |
| Case 23 | 1 | 1 | 1 |
| Case 24 | 1 | 1 | 1 |
| Case 25 | 0 | 1 | 1 |
| Case 26 | 0 | 0 | 0 |
| Case 27 | 0 | 0 | 0 |
| Case 28 | 0 | 0 | 0 |
| Case 29 | 0 | 0 | 0 |
| Case 30 | 0 | 1 | 0 |
| Case 31 | 1 | 1 | 1 |
| Case 32 | 0 | 0 | 0 |
| Case 33 | 0 | 0 | 0 |
| Case 34 | 0 | 1 | 1 |
| Case 35 | 0 | 0 | 0 |
| Case 36 | 1 | 1 | 1 |
| Case 37 | 1 | 1 | 1 |

(0:absent, 1:present)

| Corona sign on<br>FS-T2WI | Rater1 | Rater2 | Rater3 |
|---------------------------|--------|--------|--------|
| Case 1                    | 0      | 0      | 0      |
| Case 2                    | 0      | 0      | 0      |
| Case 3                    | 1      | 1      | 1      |
| Case 4                    | 0      | 0      | 0      |
| Case 5                    | 1      | 1      | 1      |
| Case 6                    | 1      | 1      | 1      |
| Case 7                    | 1      | 1      | 1      |
| Case 8                    | 1      | 1      | 1      |
| Case 9                    | 0      | 0      | 0      |
| Case 10                   | 0      | 1      | 0      |
| Case 11                   | 0      | 0      | 0      |
| Case 12                   | 0      | 0      | 0      |
| Case 13                   | 0      | 1      | 1      |

|         |   |   |   |
|---------|---|---|---|
| Case 14 | 0 | 0 | 0 |
| Case 15 | 0 | 1 | 1 |
| Case 16 | 1 | 1 | 1 |
| Case 17 | 0 | 1 | 0 |
| Case 18 | 0 | 0 | 0 |
| Case 19 | 1 | 1 | 1 |
| Case 20 | 1 | 1 | 1 |
| Case 21 | 1 | 1 | 1 |
| Case 22 | 1 | 1 | 1 |
| Case 23 | 1 | 1 | 1 |
| Case 24 | 1 | 1 | 1 |
| Case 25 | 1 | 1 | 1 |
| Case 26 | 1 | 1 | 1 |
| Case 27 | 1 | 1 | 0 |
| Case 28 | 1 | 1 | 1 |
| Case 29 | 0 | 0 | 0 |
| Case 30 | 1 | 1 | 1 |
| Case 31 | 1 | 1 | 1 |
| Case 32 | 1 | 1 | 0 |
| Case 33 | 0 | 1 | 0 |
| Case 34 | 1 | 1 | 1 |
| Case 35 | 0 | 0 | 0 |
| Case 36 | 0 | 1 | 0 |
| Case 37 | 1 | 1 | 1 |

(0:absent, 1:present)

| Corona sign on<br>CE-FS-T1WI | Rater1 | Rater2 | Rater3 |
|------------------------------|--------|--------|--------|
| Case 1                       | 0      | 0      | 0      |
| Case 2                       | 0      | 1      | 1      |
| Case 3                       | 1      | 1      | 1      |
| Case 4                       | 0      | 0      | 0      |
| Case 5                       | 1      | 1      | 1      |
| Case 6                       | 1      | 1      | 1      |



|         |   |   |   |
|---------|---|---|---|
| Case 7  | 1 | 1 | 1 |
| Case 8  | 1 | 1 | 1 |
| Case 9  | 0 | 0 | 0 |
| Case 10 | 0 | 1 | 0 |
| Case 11 | 1 | 0 | 0 |
| Case 12 | 0 | 0 | 0 |
| Case 13 | 0 | 1 | 1 |
| Case 14 | 0 | 0 | 0 |
| Case 15 | 1 | 1 | 1 |
| Case 16 | 1 | 1 | 1 |
| Case 17 | 0 | 1 | 0 |
| Case 18 | 0 | 0 | 0 |
| Case 19 | 1 | 1 | 1 |
| Case 20 | 1 | 1 | 1 |
| Case 21 | 2 | 2 | 2 |
| Case 22 | 1 | 1 | 1 |
| Case 23 | 1 | 1 | 1 |
| Case 24 | 1 | 1 | 1 |
| Case 25 | 1 | 1 | 1 |
| Case 26 | 1 | 1 | 1 |
| Case 27 | 1 | 1 | 0 |
| Case 28 | 1 | 1 | 1 |
| Case 29 | 0 | 0 | 0 |
| Case 30 | 1 | 1 | 1 |
| Case 31 | 1 | 1 | 1 |
| Case 32 | 1 | 1 | 1 |
| Case 33 | 0 | 1 | 0 |
| Case 34 | 1 | 1 | 1 |
| Case 35 | 2 | 2 | 2 |
| Case 36 | 0 | 0 | 0 |
| Case 37 | 1 | 1 | 1 |

(0:absent, 1:present, 2:lack of contrast-enhanced images)
